# Supplementary material for: Age Is Associated With the Efficacy of Anticoagulant Therapies Against Sepsis-Induced Disseminated Intravascular Coagulation
Source: PubMed Central journal article supplement — Clin Appl Thromb Hemost. 2021 Jul 19;27:10760296211033030. doi: 10.1177/10760296211033030 (PMC8293841; doi:10.1177/10760296211033030), 2021-07-19
Supplement: sj-pdf-1-cat-10.1177_10760296211033030.pdf [file sj-pdf-1-cat-10.1177_10760296211033030.pdf]

## Supplemental Table

**Table S1** The 32 variables used to calculate propensity score in the regression models

|                                   |                                                                                                                                                              |
|-----------------------------------|--------------------------------------------------------------------------------------------------------------------------------------------------------------|
| Patient characteristics           | 1) Age, 2) sex                                                                                                                                               |
| Illness severity                  | 3) SIRS score, 4) SOFA score, 5) APACHE II score, 6) JAAM DIC score, 7) ISTH overt DIC score, 8) positive blood culture                                      |
| 9) Source of ICU admission        | Emergency department/ward/other hospital                                                                                                                     |
| Pre-existing condition            | 10) Liver insufficiency, 11) chronic heart failure, 12) chronic respiratory disorder, 13) chronic hemodialysis, 14) immunocompromised                        |
| New organ dysfunction             | 15) Respiratory, 16) cardiovascular, 17) renal, 18) hepatic, 19) coagulation                                                                                 |
| 20) ICU characteristics           | Closed ICU/open ICU/other                                                                                                                                    |
| 21) Primary source of infection   | Abdomen/lung/urinary tract/bone+soft tissue/central nervous system/other+unknown                                                                             |
| 22) Causal microorganisms         | Gram-positive bacteria/Gram-negative bacteria/mixed organisms/other/unknown                                                                                  |
| Anticoagulant therapy not for DIC | 23) Nafamostat mesilate for renal replacement therapy, 24) heparin for venous thromboembolism prophylaxis, 25) warfarin, 26) anti-platelet drugs, 27) others |
| Other therapeutic interventions   | 28) Immunoglobulin, 29) low-dose steroid, 30) renal replacement therapy, 31) PMX-DHP, 32) surgical intervention                                              |

SIRS, Systemic Inflammatory Response Syndrome; SOFA, Sequential Organ Failure Assessment; APACHE, Acute Physiology and Chronic Health Evaluation; JAAM, Japanese Association for Acute Medicine; DIC, disseminated intravascular coagulation; ISTH, International Society on Thrombosis and Hemostasis; ICU, intensive care unit; PMX-DHP, polymyxin B direct hemoperfusion.

**Table S2.** Time-related alteration in coagulation biomarkers in patients with and without anticoagulant therapy

|                                               | Anticoagulant group<br>n = 863 | Control group<br>n = 565 | p Value |
|-----------------------------------------------|--------------------------------|--------------------------|---------|
| Platelet count (10 <sup>3</sup> /μL)          |                                |                          |         |
| Day 1                                         | 75 (46-132)                    | 96 (56-164)              | <0.001  |
| Day 2                                         | 57 (34-95)                     | 78 (45-130)              | <0.001  |
| Day 3                                         | 46 (27-80)                     | 70 (44-116)              | <0.001  |
| Day 4                                         | 50 (28-80)                     | 66 (40-115)              | <0.001  |
| Day 5                                         | 55 (31-90.5)                   | 73 (41-120)              | <0.001  |
| Day 6                                         | 67 (38-114)                    | 89 (51-152)              | <0.001  |
| Day 7                                         | 84 (48-147)                    | 114 (62-190)             | <0.001  |
| PT (INR)                                      |                                |                          |         |
| Day 1                                         | 1.4 (1.2-1.7)                  | 1.3 (1.2-1.6)            | <0.001  |
| Day 2                                         | 1.4 (1.3-1.7)                  | 1.3 (1.2-1.6)            | <0.001  |
| Day 3                                         | 1.3 (1.2-1.5)                  | 1.2 (1.1-1.4)            | <0.001  |
| Day 4                                         | 1.2 (1.1-1.4)                  | 1.2 (1.1-1.3)            | 0.006   |
| Day 5                                         | 1.2 (1.1-1.3)                  | 1.2 (1.0-1.3)            | 0.026   |
| Day 6                                         | 1.2 (1.1-1.3)                  | 1.2 (1.1-1.3)            | 0.129   |
| Day 7                                         | 1.2 (1.1-1.3)                  | 1.2 (1.1-1.3)            | 0.024   |
| Fibrinogen (mg/dL)                            |                                |                          |         |
| Day 1                                         | 365 (237.5-524)                | 384.5 (255.5-531)        | 0.198   |
| Day 2                                         | 348 (234-490)                  | 374.5 (273.5-505)        | 0.033   |
| Day 3                                         | 385.5 (270-520)                | 414 (310-529.5)          | 0.022   |
| Day 4                                         | 385 (261-524)                  | 424 (291-550)            | 0.015   |
| Day 5                                         | 373 (254-502)                  | 401 (293-511)            | 0.026   |
| Day 6                                         | 352.5 (241.5-457.5)            | 379 (281-512)            | 0.022   |
| Day 7                                         | 338 (237-435)                  | 375 (281-488)            | 0.004   |
| Fibrin/fibrinogen degradation product (μg/mL) |                                |                          |         |
| Day 1                                         | 33.2 (17.0-70.1)               | 29.1 (16.0-57.2)         | 0.134   |
| Day 2                                         | 27.0 (14.2-56.5)               | 26.0 (13.3-48.1)         | 0.129   |
| Day 3                                         | 23.2 (12.5-42.0)               | 24.4 (14.4-46.1)         | 0.479   |
| Day 4                                         | 18.6 (11.1-34.0)               | 23.0 (13.0-39.2)         | 0.023   |
| Day 5                                         | 16.3 (10.2-30.3)               | 21.4 (11.7-35.0)         | 0.003   |
| Day 6                                         | 16.5 (10.7-29.1)               | 22.0 (12.7-36.6)         | 0.004   |

|                              |                  |                  |       |
|------------------------------|------------------|------------------|-------|
| Day 7                        | 17.0 (11.0-28.0) | 19.5 (12.2-33.7) | 0.049 |
| D-dimer ( $\mu\text{g/mL}$ ) |                  |                  |       |
| Day 1                        | 15.5 (7.1-32.9)  | 14.9 (7.8-28.5)  | 0.297 |
| Day 2                        | 13.1 (5.9-28.6)  | 11.9 (6.1-24.4)  | 0.451 |
| Day 3                        | 10.2 (5.2-22.0)  | 11.5 (5.6-21.2)  | 0.732 |
| Day 4                        | 8.8 (4.5-18.7)   | 11.0 (5.8-20.5)  | 0.025 |
| Day 5                        | 8.1 (4.7-14.8)   | 10.2 (5.6-21.4)  | 0.006 |
| Day 6                        | 7.9 (4.7-16.1)   | 10.8 (6.1-23.8)  | 0.005 |
| Day 7                        | 8.9 (4.8-15.9)   | 10.1 (5.7-20.5)  | 0.020 |

---

Data are presented as the median (first and third quartiles). Differences between groups were assessed using the Mann-Whitney U test. INR, international normalized ratio.

---

## Supplemental FIGURE

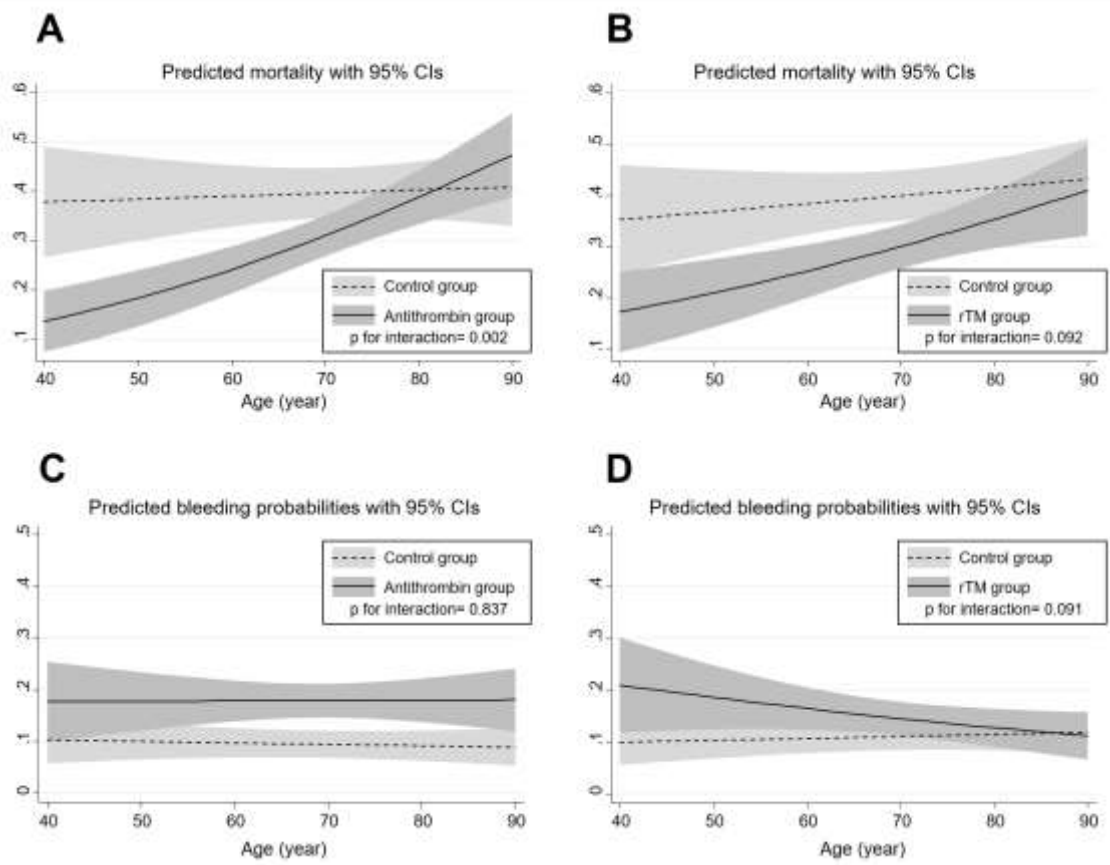

**Fig. S1** Regression line for age-related change in predicted mortality and the risk of severe bleeding complication in each treatment group estimated by logistic regression model with a two-way interaction term by comparing each anticoagulant therapy. A, C. Antithrombin group B, D. rTM group CI, confidence interval. A.

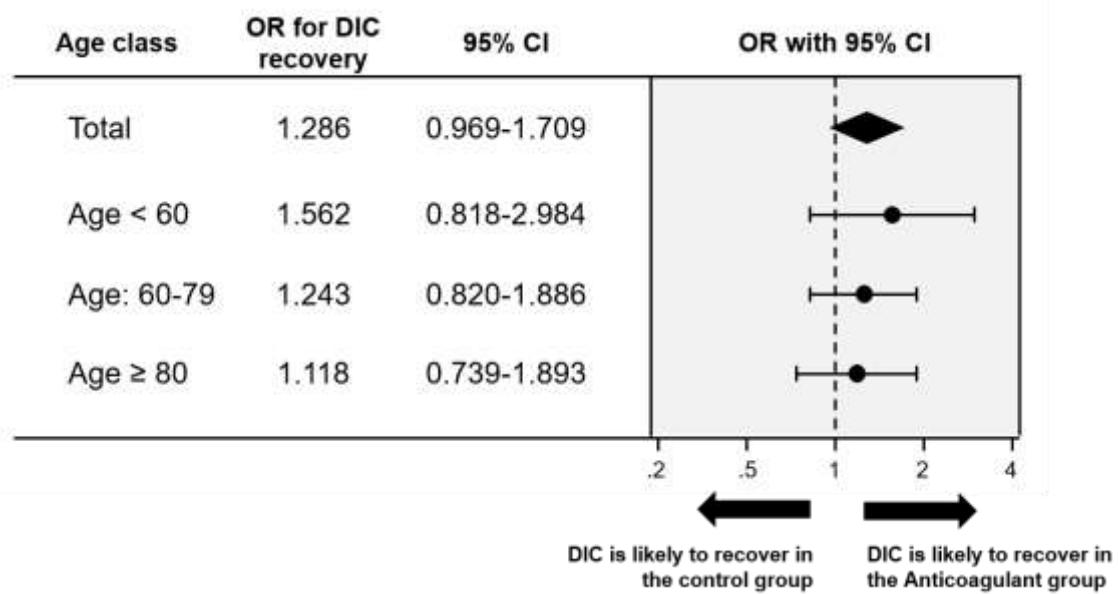

**Fig. S2** Logistic regression analysis adjusted by propensity score for the association of anticoagulant therapy and DIC recovery rate in the three age classes. Anticoagulant therapy was tended to be associated with the increased rate of DIC recovery in all age classes.
